# Supplementary material for: Urinary tract colonization is enhanced by a plasmid that regulates uropathogenic Acinetobacter baumannii chromosomal genes
Source: PubMed Central journal article supplement (PMC6591400; doi:10.1038/s41467-019-10706-y), 2019-06-24
Supplement: 41467_2019_10706_MOESM1_ESM.pdf [file 41467_2019_10706_MOESM1_ESM.pdf]

Supplementary Information

**Urinary tract colonization is enhanced by a plasmid that regulates uropathogenic *Acinetobacter baumannii* chromosomal genes**

Di Venanzio et al.

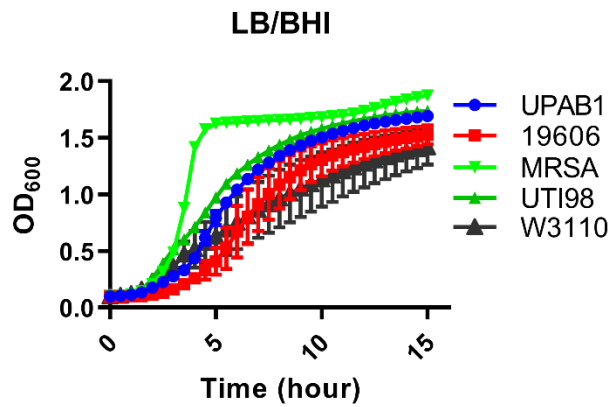

**Supplementary Figure 1. UPAB1 and 19606 strains display indistinguishable growth in rich media.**

Growth curves of UPAB1, 19606, MRSA 1369, *E. coli* UTI89 and *E. coli* W3110 in rich media (LB or BHI) as measured by OD<sub>600</sub>. The number of independent data points represented is four. Data represent mean and standard deviation values. Source data are provided as a Source Data file.

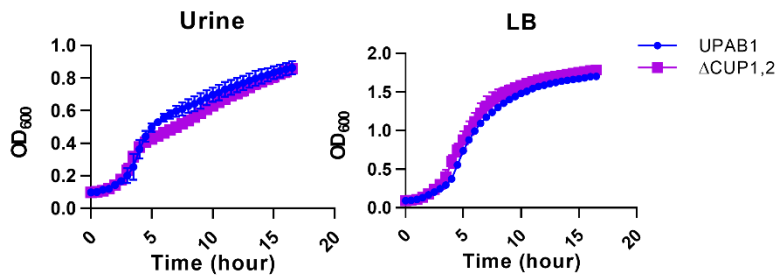

**Supplementary Figure 2. UPAB1 and  $\Delta$ CUP1,2 strain display identical growth in rich medium and urine.** Growth curves of wild-type UPAB1 and  $\Delta$ CUP1,2 mutant strain in healthy pooled urine (left panel) or rich media (LB, right panel) as measured by OD<sub>600</sub>. The number of independent data points represented is four. Data represent mean and standard deviation values. Source data are provided as a Source Data file.

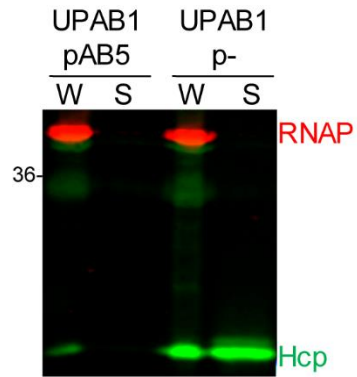

**Supplementary Figure 3. pAB5 represses the T6SS in UPAB1.** Western blot assays probing for Hcp (green) expression and secretion in whole-cell (W) or supernatants (S) of wild-type UPAB1 and UPAB1p- mutant strain. RNA polymerase (RNAP, red) was used as a loading and lysis control. Source data are provided as a Source Data file.

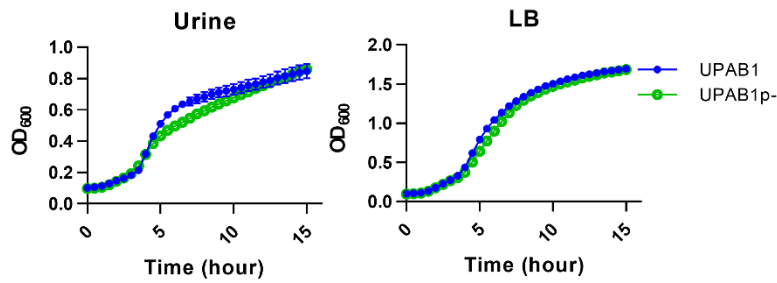

**Supplementary Figure 4. UPAB1 and UPAB1p- strain display identical growth in rich medium and urine.** Growth curves of wild-type UPAB1 and UPAB1p- mutant strain in healthy pooled urine (left panel) or rich media (LB, right panel) as measured by OD<sub>600</sub>. The number of independent data points represented is four. Data represent mean and standard deviation values. Source data are provided as a Source Data file.

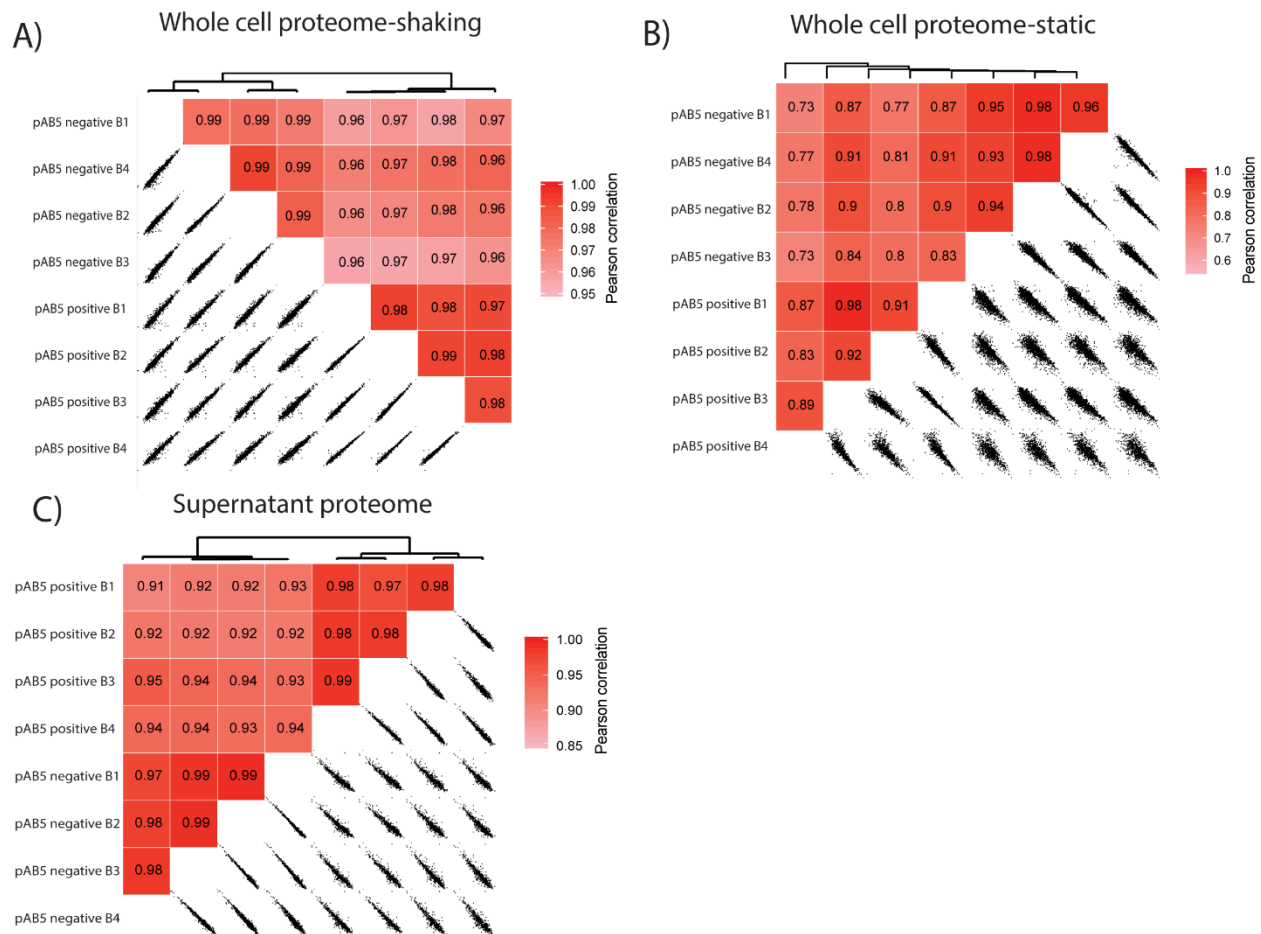

**Supplementary Figure 5. Pearson correlation analysis of proteomics biological replicates in the absent/presence of pAB5.** To assess the reproducibility of the proteome samples, heat maps and correlation plots are provided for; A) Whole proteome replicates grown under shaking demonstrate a mean correlation between biological replicate of 0.96 and a correlation of 0.99 within biological groups. B) Whole proteome replicates grown under static condition demonstrate a mean correlation between biological replicate of 0.86 and a correlation of 0.91 within biological groups. C) Secretome replicates demonstrated a mean correlation of 0.92 and a correlation of 0.98 within biological groups.

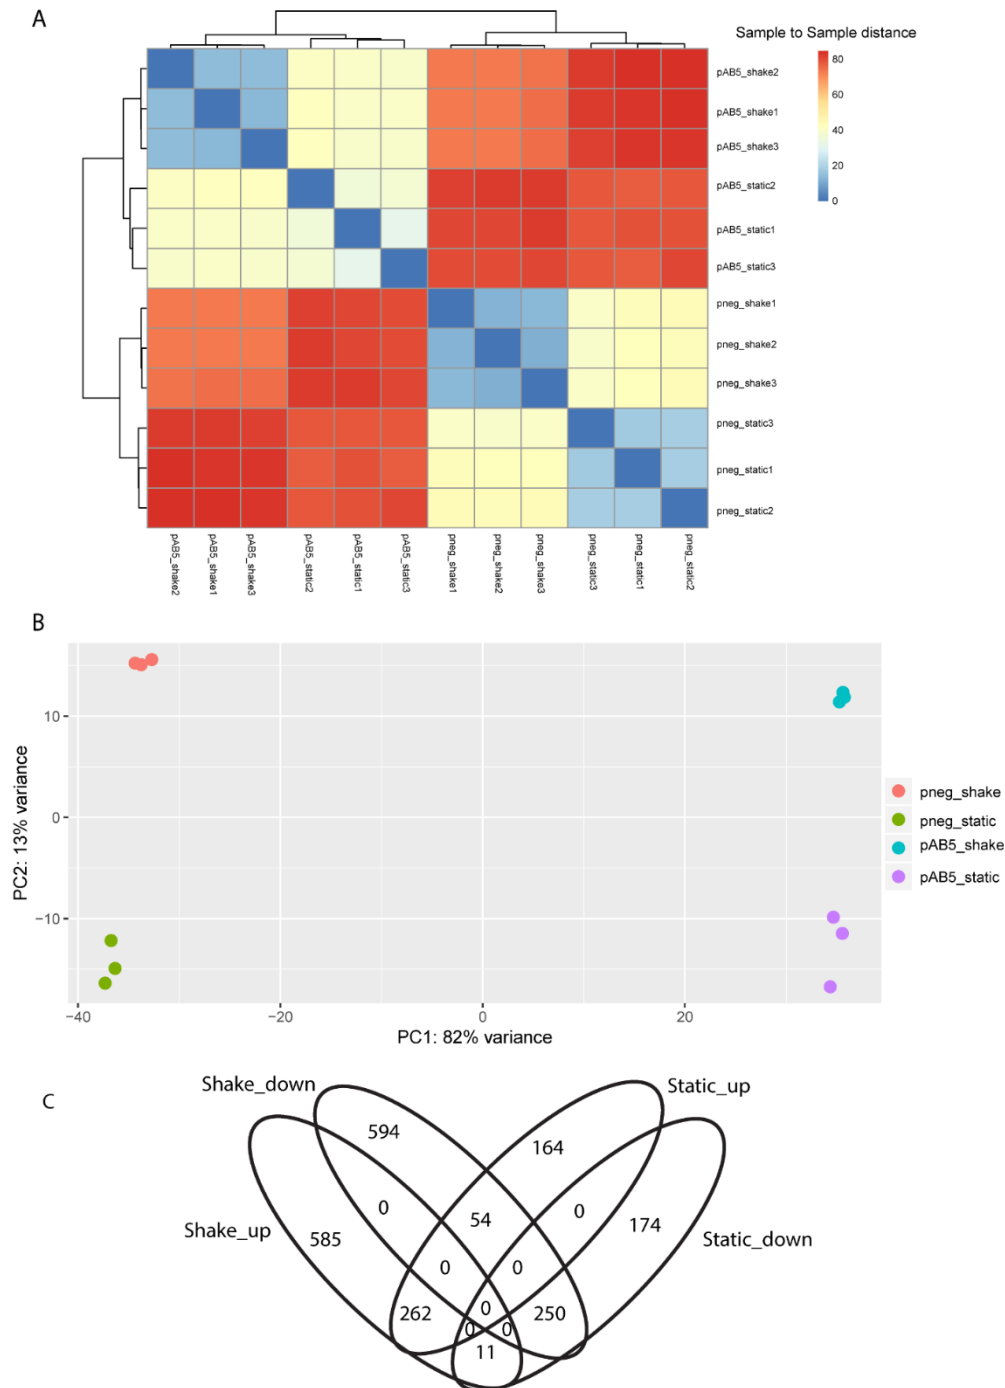

**Supplementary Figure 6. Between group variation is much greater than between sample variation.**

Heatmap (A) and principal component analysis (B) of the variance stabilized transformed read counts used as input for DESeq2 analysis indicates that biological replicates cluster next to one another and that the presence of pAB5 and growth conditions drastically change the transcription profile of UPAB1. Venn-diagram (C) analysis of the DEGs with adjusted p-values <.1 indicates that there is some overlap between the transcriptional profile of UPAB1 in the various environments.

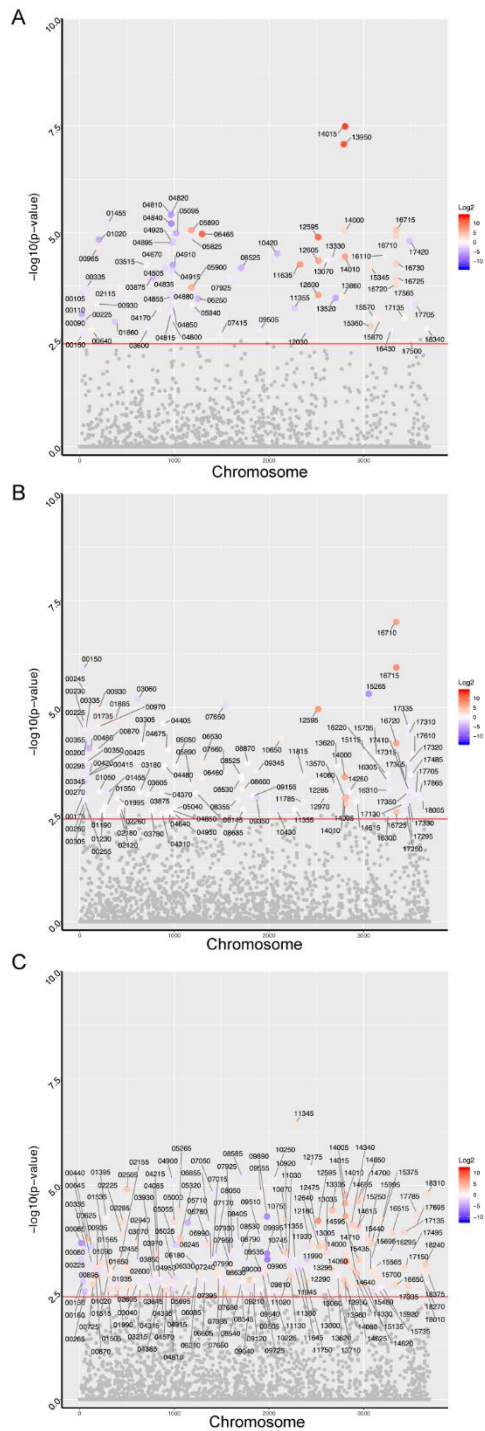

**Supplementary Figure 7. pAB5 modulates several bacterial proteins.** Quantitative proteome analysis of the effect of pAB5 on the secretome (A), the whole proteome with shaking (B) and whole proteome under static conditions (C). Manhattan plots demonstrating the significance of protein alteration,  $-\log_{10}(\text{p-value})$ , vs position in the genome are shown. The direction of the protein alteration is colored coded according to the provided heat map. Full data are shown.



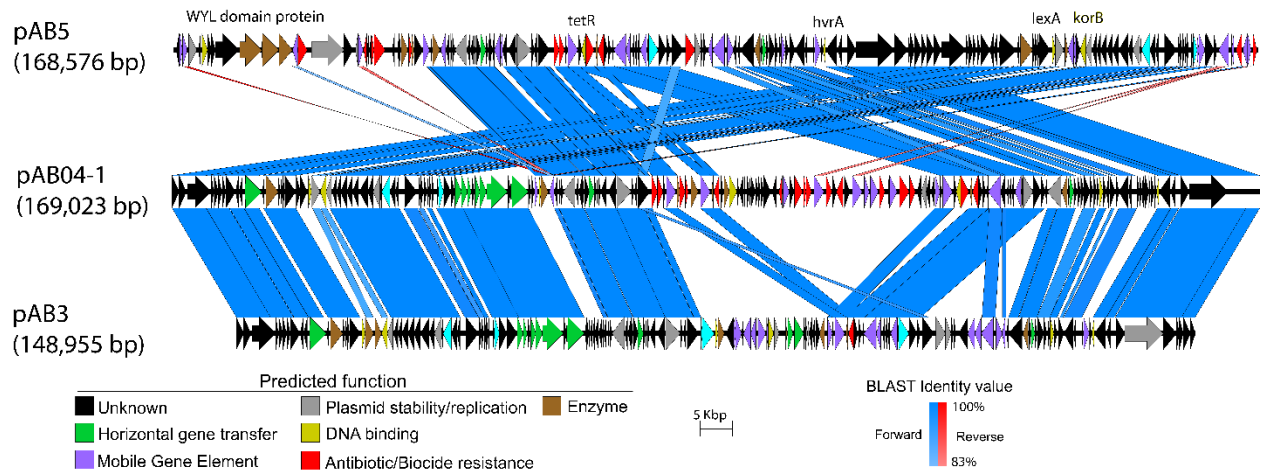

**Supplementary Figure 8. *A. baumannii* LCPs share common structural features.** Assembled plasmids from PacBio sequencing of UPAB1 (pAB5), Ab04 (pAB04-1) and Ab17978 (pAB3) strains. The transcriptional regulators identified in pAB5 are listed in the top of the figure.

Supplementary Table 1. Summary of 13 *Ab* epidemiological studies

|                          | Study Dates    | Location      | Ref | Number of isolate per anatomical site (n) |              |              |              |             | Total        |
|--------------------------|----------------|---------------|-----|-------------------------------------------|--------------|--------------|--------------|-------------|--------------|
|                          |                |               |     | Urinary                                   | Respiratory  | SST/MSK      | Endovascular | Other       |              |
| Siau, et al, 1996        | 1/1990-11/1994 | Hong Kong     | 1   | 1434                                      | 2724         | 1856         | 436          | 596         | <b>7046</b>  |
| Ruiz, et al, 1999        | 1991-1996      | Spain         | 2   | 439                                       | 434          | 325          | 195          | 139         | <b>1532</b>  |
| Iregbu, et al, 2002      | 2001           | Nigeria       | 3   | 17                                        | 0            | 37           | 4            | 0           | <b>58</b>    |
| Tognim, et al, 2004      | 1/1997-12/2001 | Latin America | 4   | 74                                        | 299          | 35           | 380          | 38          | <b>826</b>   |
| Perencevich, et al, 2008 | 1/1998-12/2005 | USA           | 5   | 260                                       | 505          | 260          | 361          | 58          | <b>1444</b>  |
| McCracken, et al, 2011   | 2007-2009      | Canada        | 6   | 4                                         | 22           | 5            | 35           | 0           | <b>66</b>    |
| Sinha, et al, 2013       | 8/2010-7/2011  | India         | 7   | 19                                        | 0            | 52           | 32           | 37          | <b>140</b>   |
| Munoz-Price, et al, 2013 | 1/1994-12/2011 | USA           | 8   | 444                                       | 2194         | 622          | 819          | 405         | <b>4484</b>  |
| Al Mobarak, et al, 2014  | 1/2010-12/2013 | Saudi Arabia  | 9   | 127                                       | 315          | 497          | 110          | 127         | <b>1176</b>  |
| Fallah, et al, 2017      | 5/2015-7/2016  | Iran          | 10  | 13                                        | 59           | 15           | 12           | 1           | <b>100</b>   |
| Biglari, et al, 2017     | 10/2010-4/2011 | Malaysia      | 11  | 17                                        | 54           | 74           | 10           | 12          | <b>167</b>   |
| Matsui, et al, 2018      | 10/2012-3/2013 | Japan         | 12  | 57                                        | 498          | 34           | 13           | 43          | <b>645</b>   |
| Current BJC Study        | 1/2007-7/2017  | USA           |     | 505                                       | 771          | 726          | 237          | 34          | <b>2273</b>  |
| <b>Pooled Total</b>      | --             | --            |     | <b>3410</b>                               | <b>7875</b>  | <b>4538</b>  | <b>2644</b>  | <b>1490</b> | <b>19957</b> |
| <b>% Pooled Total</b>    | --             | --            |     | <b>17.1%</b>                              | <b>39.5%</b> | <b>22.7%</b> | <b>13.2%</b> | <b>7.5%</b> | <b>100%</b>  |

Supplementary Table 2. Secreted proteins differentially regulated by pAB5.

| D1G37                   | Name                                                                | Function | Signal | Fold change |
|-------------------------|---------------------------------------------------------------------|----------|--------|-------------|
| Up-regulated proteins   |                                                                     |          |        |             |
| 110                     | Cell surface protein Ata                                            | T5SS     | NO     | 4.59        |
| 1455                    | OmpW family protein                                                 |          | YES    | 1.64        |
| 6250                    | M23 family metallopeptidase                                         |          | YES    | 4.02        |
| 17420                   | Type I 3-dehydroquininate dehydratase CDS                           |          | YES    | 3.63        |
| 19690                   | Hypothetical protein                                                |          | YES    | 9.42        |
| Down-regulated proteins |                                                                     |          |        |             |
| 965                     | Hemagglutinin                                                       | T5SS     | NO     | 1.55        |
| 2115                    | Insulinase family protein                                           |          | YES    | 0.98        |
| 4670                    | DUF3108 domain-containing protein                                   |          | YES    | 0.97        |
| 5890                    | Hypothetical protein                                                | T6SS     | YES    | 6.00        |
| 5900                    | Rhs element Vgr                                                     | T6SS     | NO     | 5.56        |
| 6465                    | LysM peptidoglycan-binding domain-containing protein                | T6SS     | NO     | 10.46       |
| 11635                   | PAAR domain-containing protein                                      | T6SS     | NO     | 7.09        |
| 12595                   | Curli production assembly transport component CsgG                  |          | YES    | 9.91        |
| 12600                   | Probable lipoprotein                                                |          | YES    | 6.80        |
| 12605                   | Phosphonate ABC transporter phosphate-binding periplasmic component |          | YES    | 6.32        |
| 13860                   | Filamentous hemagglutinin N-terminal domain-containing protein      | T5SS     | NO     | 1.08        |
| 13950                   | VgrG                                                                | T6SS     | NO     | 11.63       |
| 14000                   | Hypothetical protein                                                | T6SS     | YES    | 2.52        |
| 14010                   | TssC                                                                | T6SS     | NO     | 6.45        |
| 14015                   | Hcp                                                                 | T6SS     | NO     | 12.26       |
| 15345                   | PrpD                                                                | CUP1     | YES    | 1.93        |
| 15360                   | PrpA                                                                | CUP1     | YES    | 3.27        |
| 16110                   | TonB-dependent siderophore receptor CDS                             |          | YES    | 0.92        |
| 16710                   | CupD                                                                | CUP2     | YES    | 3.08        |
| 16715                   | CupC                                                                | CUP2     | NO     | 3.91        |
| 16720                   | CupB                                                                | CUP2     | YES    | 2.51        |
| 16725                   | CupA                                                                | CUP2     | YES    | 2.76        |
| 16730                   | FimF                                                                | CUP2     | YES    | 3.43        |

Supplementary Table 3. Proteins differentially regulated by pAB5 on SHc.

| D1G37                   | Name                                                              | Function | Fold change |
|-------------------------|-------------------------------------------------------------------|----------|-------------|
| Up-regulated proteins   |                                                                   |          |             |
| 270                     | TsaE                                                              |          | 3.26        |
| 480                     | Hypothetical protein                                              |          | 4.10        |
| 1455                    | OmpW family protein                                               |          | 1.75        |
| 3060                    | Hypothetical protein                                              |          | 2.33        |
| 9350                    | Hypothetical protein                                              |          | 2.69        |
| 15265                   | Amino acid ABC transporter ATP-binding protein                    |          | 6.52        |
| Down-regulated proteins |                                                                   |          |             |
| 150                     | Membrane alanine aminopeptidase N                                 |          | 1.62        |
| 175                     | 5-carboxymethyl-2-hydroxymuconate Delta-isomerase                 |          | 1.28        |
| 200                     | Aldehyde dehydrogenase family protein                             |          | 1.60        |
| 225                     | Peptidyl-prolyl cis-trans isomerase                               |          | 1.26        |
| 230                     | UDP-2,3-diacetylglucosamine diphosphatase                         |          | 1.09        |
| 245                     | Oxygen-insensitive NAD(P)H nitroreductase                         |          | 1.02        |
| 295                     | Hypothetical protein                                              |          | 0.40        |
| 335                     | Bifunctional aconitate hydratase 2/2-methylisocitrate dehydratase |          | 1.06        |
| 415                     | Ubiquinone biosynthesis monooxygenase UbiB                        |          | 1.19        |
| 425                     | Flavin reductase                                                  |          | 1.70        |
| 870                     | NirD/YgiW/YdeI family stress tolerance protein                    |          | 1.34        |
| 970                     | ShIB/FhaC/HecB family hemolysin secretion/activation protein CDS  | T5SS     | 1.03        |
| 1735                    | TonB-dependent siderophore receptor                               |          | 2.43        |
| 1885                    | LysR family transcriptional regulator                             |          | 1.09        |
| 5890                    | Hypothetical protein                                              |          | 1.48        |
| 6530                    | HutG                                                              |          | 1.50        |
| 7650                    | D-amino acid dehydrogenase small subunit                          |          | 1.82        |
| 10430                   | Type IV fimbrial biogenesis protein PilY1                         |          | 1.48        |
| 10650                   | N-acetyl-L,L-diaminopimelate deacetylase                          |          | 1.15        |
| 12595                   | Curli production assembly transport component CsgG                |          | 6.93        |
| 11815                   | PgaB                                                              | PNAG     | 1.16        |
| 14000                   | Hypothetical protein                                              | T6SS     | 6.48        |
| 14005                   | TssB                                                              | T6SS     | 3.49        |
| 14010                   | TssC                                                              | T6SS     | 4.90        |
| 14060                   | ClpV                                                              | T6SS     | 5.18        |
| 16710                   | CupD                                                              | CUP2     | 6.53        |
| 16715                   | CupC                                                              | CUP2     | 7.96        |
| 16720                   | CupB                                                              | CUP2     | 6.44        |
| 16725                   | CupA                                                              | CUP2     | 4.30        |
| 17350                   | Outer membrane porin, OprD family                                 |          | 1.89        |

Supplementary Table 4. Genes differently regulated by pAB5 in STc.

| D1G37 | Fold Change  | Name                                           | Function |
|-------|--------------|------------------------------------------------|----------|
| 09890 | 5.70         | hypothetical protein                           |          |
| 15260 | 5.47         | amino acid ABC transporter permease            |          |
| 09895 | 5.31         | molecular chaperone DnaJ                       |          |
| 09900 | 5.05         | hypothetical protein                           |          |
| 09905 | 5.04         | hypothetical protein                           |          |
| 09910 | 5.03         | hypothetical protein                           |          |
| 09885 | 4.39         | hypothetical protein                           |          |
| 15265 | 4.04         | amino acid ABC transporter ATP-binding protein |          |
| 00085 | 3.23         | cell envelope biogenesis protein OmpA          |          |
| 12500 | 3.23         | hypothetical protein                           |          |
| 13875 | 3.17         | TetR/AcrR family transcriptional regulator     |          |
| 00255 | 3.06         | RNA chaperone Hfq                              |          |
| 09915 | 3.00         | hypothetical protein                           |          |
| 00080 | 2.98         | T1SS secreted agglutinin RTX                   |          |
| 00185 | 2.93         | iron-containing alcohol dehydrogenase          |          |
| 13870 | 2.67         | hypothetical protein                           |          |
| 14065 | <b>-4.60</b> | TssA                                           | T6SS     |
| 14075 | <b>-4.39</b> | tssL                                           | T6SS     |
| 14070 | <b>-4.22</b> | TssK                                           | T6SS     |
| 14025 | <b>-4.18</b> | TssF                                           | T6SS     |
| 14030 | <b>-4.12</b> | TssG                                           | T6SS     |
| 14020 | <b>-4.07</b> | TssE                                           | T6SS     |
| 14035 | <b>-3.98</b> | hypothetical protein                           | T6SS     |
| 14015 | <b>-3.92</b> | Hcp                                            | T6SS     |
| 14060 | <b>-3.82</b> | ClpV                                           | T6SS     |
| 14010 | <b>-3.81</b> | TssC                                           | T6SS     |
| 14080 | <b>-3.68</b> | hypothetical protein                           | T6SS     |
| 14040 | <b>-3.67</b> | TssM                                           | T6SS     |
| 13955 | <b>-3.59</b> | hypothetical protein                           | T6SS     |
| 14045 | <b>-3.50</b> | TagF                                           | T6SS     |
| 14050 | <b>-3.47</b> | tagN                                           | T6SS     |
| 14085 | <b>-3.45</b> | tagX                                           | T6SS     |
| 00935 | <b>-3.33</b> | TetR/AcrR family transcriptional regulator     |          |
| 14005 | <b>-3.33</b> | tssB                                           | T6SS     |
| 14000 | <b>-3.32</b> | hypothetical protein                           |          |
| 12600 | <b>-3.27</b> | Probable lipoprotein                           |          |
| 13960 | <b>-3.10</b> | hypothetical protein                           | T6SS     |
| 15360 | <b>-1.79</b> | prpA                                           | CUP1     |
| 15345 | <b>-1.62</b> | prpD                                           | CUP1     |

Supplementary Table 5. Strain list

| Strain                    | Description                                                     | Ref          |
|---------------------------|-----------------------------------------------------------------|--------------|
| UPAB1                     | MDR Urine isolate with pAB5 plasmid                             | This study   |
| UPAB1p-                   | Derivative strain without pAB5                                  | This study   |
| UPAB1pAB3                 | Transconjugant strain                                           | This study   |
| UPAB1pAB4                 | Transconjugant strain                                           | This study   |
| UPAB1 $\Delta$ CUP1,2     | Unmarked deletion of <i>ABCD</i> genes from CUP1 and CUP2 locus | This study   |
| MRSA 1369                 | Urine isolate                                                   | 13           |
| <i>E. faecalis</i> O671RF | Urine isolate                                                   | 13           |
| <i>E. coli</i> UTI89      | Urine isolate                                                   | Hultgren lab |

Supplementary Table 6. Primer list

|                  |                                                                                                             |
|------------------|-------------------------------------------------------------------------------------------------------------|
| CUP1 DS F<br>FRT | ATAATGTGTATGATCATTGACTTTTTTAGTATTAATTAATAAATTATTCATTCTATAA<br>AGCCTACTACTTACTACTAAGATCTAGTGTTTAGAAGAAATA    |
| CUP1 US R<br>FRT | AAAATAATTTTCATGATGTTTTACCATATGGTATAAATTAATAAATAAACCAGCATTTA<br>TCAATAAAAAATAACCAATCAAATACATAAAAAATATAATGTT  |
| CUP1out F        | GCAAATTGTGATCTATTTCCC                                                                                       |
| CUP1 out R       | CCAAACTCCAGATGATCTTTTATTG                                                                                   |
| CUP2 US R<br>Frt | TTTGTTTAAAAAGTGTTAGCATTGTTACATTACTTTTCAAGATGTCAAACACTGGA<br>AAAGTAAGGAATTAACTTTTATCCAGACTTTTGAGAAAACACT     |
| CUP2 DS F frt    | ATATTCCTATCGAGTTAAGTATGAAATTTTTAGAAAAGTAAAAGTTATTATTAATATT<br>TAATTATTTGAAAATTATTAATTTTATTAACACTATTGAATATGA |
| CUP2 out F       | ATGTGACTTTTTGGCTAGCC                                                                                        |
| CUP2 out R       | TCTTATCTCTATGATTCCTTTCTTC                                                                                   |

## Supplementary References

1. Siau, H., Yuen, K. Y., Wong, S. S., Ho, P. L. & Luk, W. K. The epidemiology of acinetobacter infections in Hong Kong. *J. Med. Microbiol.* **44**, 340–7 (1996).
2. Ruiz, J. *et al.* Evolution of resistance among clinical isolates of Acinetobacter over a 6-year period. *Eur. J. Clin. Microbiol. Infect. Dis.* **18**, 292–5 (1999).
3. Iregbu, K. C., Ogunsola, F. T. & Odugbemi, T. O. Infections caused by Acinetobacter species and their susceptibility to 14 antibiotics in Lagos University Teaching Hospital, Lagos. *West Afr. J. Med.* **21**, 226–9 (2002).
4. Tognim, M. C. B. *et al.* Resistance trends of Acinetobacter spp. in Latin America and characterization of international dissemination of multi-drug resistant strains: five-year report of the SENTRY Antimicrobial Surveillance Program. *Int. J. Infect. Dis.* **8**, 284–291 (2004).
5. Perencevich, E. N. *et al.* Summer Peaks in the Incidences of Gram-Negative Bacterial Infection Among Hospitalized Patients. *Infect. Control Hosp. Epidemiol.* **29**, 1124–31 (2008).
6. McCracken, M. *et al.* Characterization of Acinetobacter baumannii and meropenem-resistant Pseudomonas aeruginosa in Canada: results of the CANWARD 2007–2009 study. *Diagn. Microbiol. Infect. Dis.* **69**, 335–341 (2011).
7. Sinha, N., Agarwal, J., Srivastava, S. & Singh, M. Analysis of carbapenem-resistant Acinetobacter from a tertiary care setting in North India. *Indian J. Med. Microbiol.* **31**, 60–3 (2013).
8. Munoz-Price, L. S. *et al.* Eighteen Years of Experience With Acinetobacter baumannii in a Tertiary Care Hospital\*. *Crit. Care Med.* **41**, 2733–2742 (2013).
9. Al Mobarak, M. F. *et al.* Antimicrobial Resistance Patterns Among Acinetobacter baumannii Isolated From King Abdulaziz Hospital, Jeddah, Saudi Arabia, Four-Year Surveillance Study (2010-2013). *Egyptian Journal of Medical Microbiology* **23**, (2014).
10. Fallah, A. *et al.* Frequency of bap and cpaA virulence genes in drug resistant clinical isolates of Acinetobacter baumannii and their role in biofilm formation. *Iran. J. Basic Med. Sci.* **20**, :849-855 (2017).
11. Biglari, S. *et al.* Antimicrobial Resistance Mechanisms and Genetic Diversity of Multidrug-Resistant Acinetobacter baumannii Isolated from a Teaching Hospital in Malaysia. *Microb. Drug Resist.* **23**, 545–555 (2017).
12. Matsui, M. *et al.* Distribution and Molecular Characterization of Acinetobacter baumannii International Clone II Lineage in Japan. *Antimicrob. Agents Chemother.* **62**, (2018).
13. Flores-Mireles, A. L. *et al.* Fibrinogen Release and Deposition on Urinary Catheters Placed during Urological Procedures. *J. Urol.* **196**, 416–421 (2016).
